# Supplementary material for: Prdm12 modulates pain-related behavior by remodeling gene expression in mature nociceptors
Source: PubMed Central journal article supplement — Pain. 2021 Dec 24;163(8):e927–41. doi: 10.1097/j.pain.0000000000002536 (PMC9341233; doi:10.1097/j.pain.0000000000002536), 2021-12-24
Supplement: jop-163-e927-s001.pdf [file jop-163-e927-s001.pdf]

## SUPPLEMENTARY FIGURE LEGENDS

**Sup. Fig. 1. Validation of the *Avil* icKO and *Rosa26* icKO mice.** (A) *Prdm12* immunostaining performed one month after tamoxifen injection showing loss of *Prdm12* in a DRG of a TAM-injected *Avil* icKO containing a Cre dependent tdTomato reporter gene (*Avil<sup>CreERT2</sup>;Rosa26<sup>Ai14</sup>;Prdm12<sup>fl/fl</sup>*) compared to a control DRG (*Avil<sup>CreERT2</sup>;Rosa26<sup>Ai14</sup>;Prdm12<sup>fl/+</sup>*) and quantification showing reduction of *Prdm12*<sup>+</sup>/tdTomato<sup>+</sup> cells in DRG of *Avil* icKO mice. (B) Double immunostaining for *Prdm12* and Peripherin on a DRG of a *Rosa26* icKO (TAM injected *Rosa26<sup>CreERT2</sup>/Rosa26<sup>CreERT2</sup>; Prdm12<sup>fl/fl</sup>*) and of a control mice (*Prdm12<sup>+/+</sup>*) and quantification showing reduction of *Prdm12*<sup>+</sup> cells in DRG of mutant mice.

**Sup. Fig. 2. Gene ontology and KEGG pathway analysis of the 71 DEGs identified in DRG of both icKO models.** (A) Gene ontology analysis based in all categories indicating the 6 most enriched subclassifications. (B) KEGG pathway analysis indicating the 3 most enriched pathways. (C) Genes deregulated in the neuroactive ligand-receptor interaction pathway, in red the upregulated ones and in green the downregulated ones.

**Sup. Fig.3. Validation by RT-qPCR of some of the identified DEGs identified in DRG of *Rosa26* icKO** \*, \*\*, \*\*\*, and \*\*\*\* indicate respective p values <0,05, <0,01, <0,001, and <0,0001 (Student's t-test,  $\alpha = 0,05$ ).

**Sup. Fig. 4. Conditional knockout of *Prdm12* in adult mice does not alter their locomotor activity.** (A) *Rosa26* icKO (n=10) and control mice (n=12) travel the same distance and spent the

same time moving in the open field device. (B) *Rosa26* icKO (n=10) and control mice (n=11) spent the same time to cross the same distance in the beam walking test. Values are means  $\pm$  SEM. (C) Time course of the nocifensive response (licking time in seconds) of *Rosa26* icKO (n=15) and control mice (n=16) until 30 min after formalin injection. Response of individual *Rosa26* icKO and control mice in the first (0-5min post-formalin injection) and second phase (15-30min post-formalin injection) is shown on the right. Note that *Rosa26* icKO mice spent more time licking their paw when compared to control mice during the second phase ( $p = 0.019$ ). Values are means  $\pm$  SEM. \* $p < 0.05$  (Student's t-test,  $\alpha = 0.05$ ).

**Sup. Fig. 5. Comparative transcriptomic analysis of the consequences of the loss of *Prdm12* in basal and inflamed DRG.** Volcano plots showing the  $-\log_{10}$  adjusted p-value as a function of the  $\log_2$  fold-changes of DEGs in basal (comparing L4-L6 DRG from uninjected sides of *Avil* icKO and control mice) and inflammatory (comparing DRG from formalin injected sides of *Avil* icKO and control mice) conditions are shown (n=5 for all biological conditions except n=4 for tamoxifen injected *Avil* icKO). Genes with a  $\log_2$  fold-change  $> 0.449$  are indicated in red, genes below the threshold are in light grey.

**Sup. Fig. 6. Comparative transcriptomic analysis of the consequences of formalin injection in DRG of *Avil* icKO and control mice.** (A) Volcano plots showing all DEGs obtained comparing the transcriptome of L4-L6 DRG from formalin injected versus non injected sides of *Rosa26* icKO and control mice, without any cut-off filtering, are shown (n=5 for all biological conditions except n=4 for tamoxifen injected *Avil* icKO). Note that many significant DEGs are found in *Avil* icKO DRG but

not in controls. (B,C) Gene ontology analysis of the DEGs identified comparing DRG of injected versus non injected sides of *Avil* icKO mice.

## APPENDIX

### List of primer pairs used for RT-qPCR analysis.

| Gene    | FW – Primer (5' to 3')  | RV – Primer (5' to 3')  |
|---------|-------------------------|-------------------------|
| Prdm12  | CTCAGGAGAGGTGCAGAAGC    | ATATCCACATGCTCTGGGGC    |
| Trpm8   | TGAGAGCTGGATCAAATGGCT   | GCTTTGTACAGCGCATAGGAA   |
| Chrna6  | GAGACACTTCGAGTTCAGCAG   | GGTCCAGGTTATCACACCGTCA  |
| TrkA    | CCCAGATGCCTTCCGTTTCA    | AGAGGCCCTGCACAGTTTTT    |
| Mrgprb5 | TCCCTGGAATGTTTCCTTCAGTT | AGATAGAGAGCGCTCAACACTG  |
| Creg2   | GAGGTGGAGTTCGCCAAGCAAG  | CTGAAGCCAGATGTGTTCTACCC |
| Grik1   | TTAACCGAAACCGAACCTTG    | CAGGACTGCCCTGCTGATAG    |
| Ism1    | GATGGCCCTGACTCCGAAG     | GGTCCCCACTATTTGTCCTGG   |
| Cysltr2 | CATGCTTGGAGCTGAGTCCTCA  | TAGCAGACGGTGAGCGTGAGAA  |
| Stk32a  | GTGACGGCTTACGAACTGCTGA  | TCTCCTGTGACCAGGCAGAAGG  |

Sup. Fig. 1

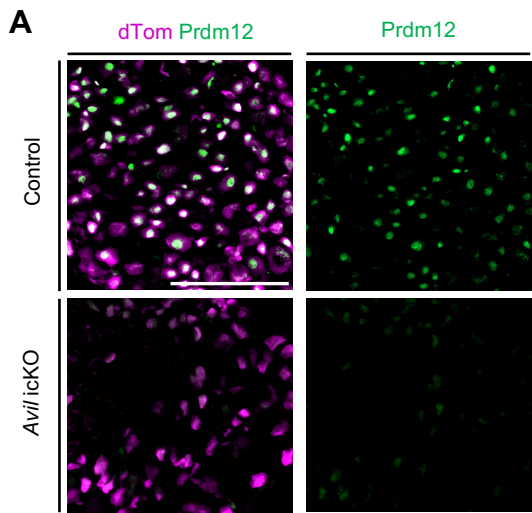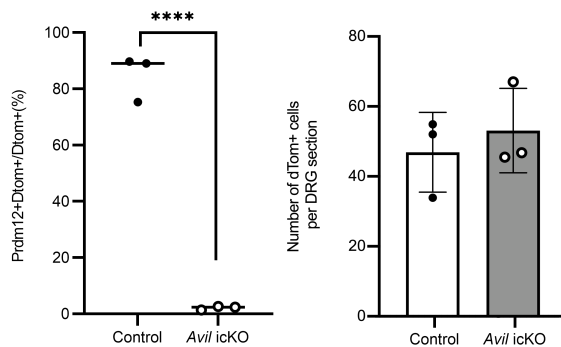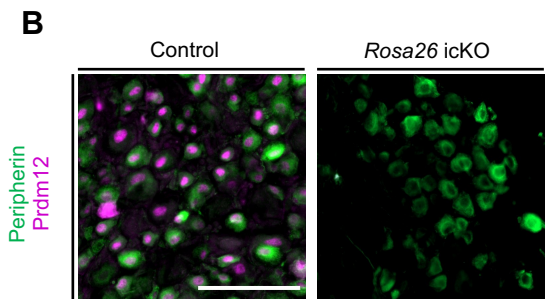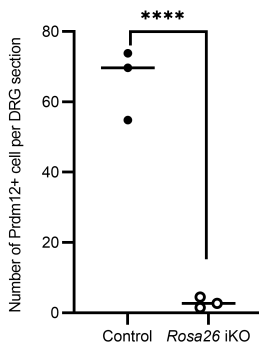

Sup. Fig. 2

A

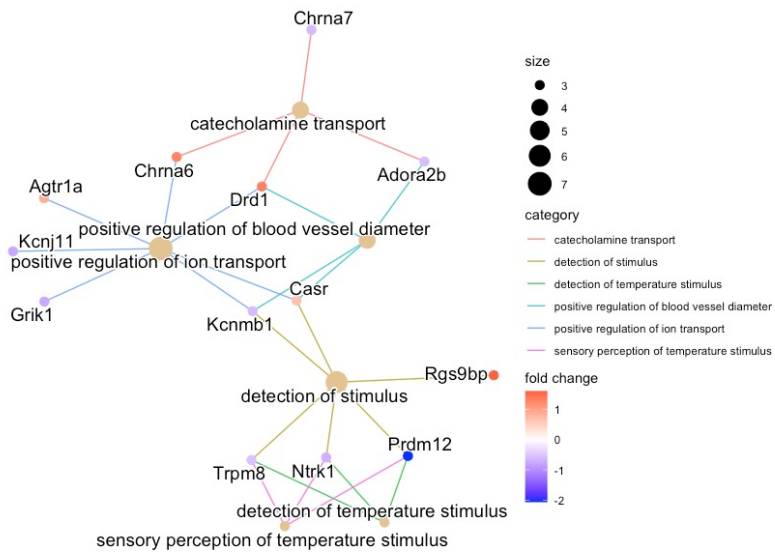

B

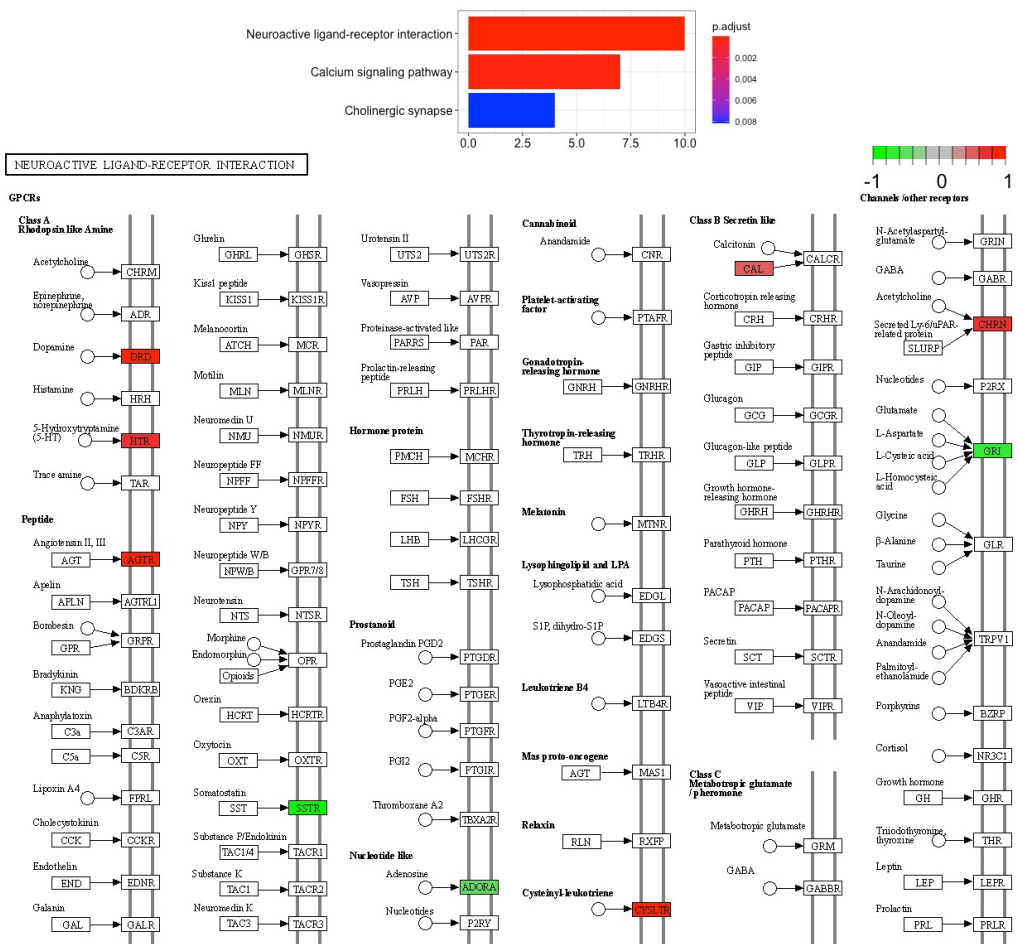

Sup. Fig. 3

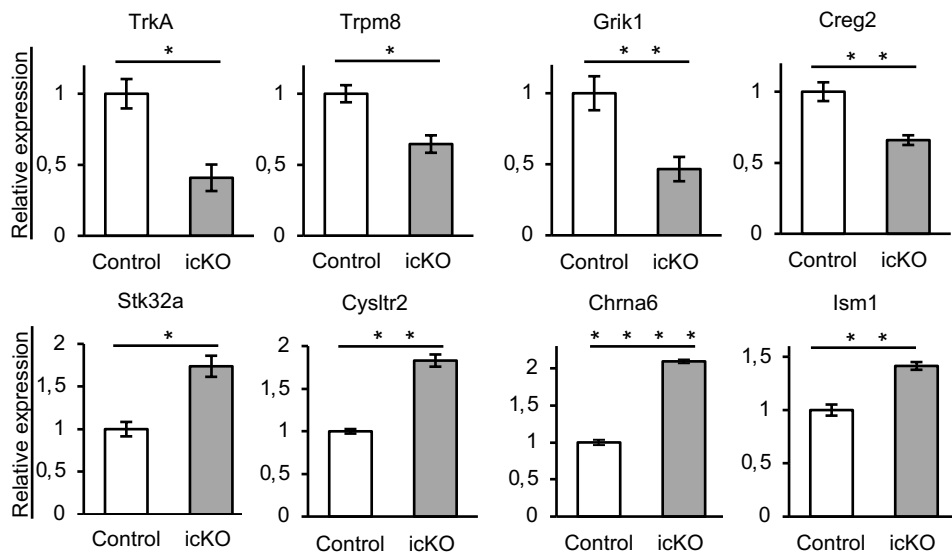

# Sup. Fig. 4

## A

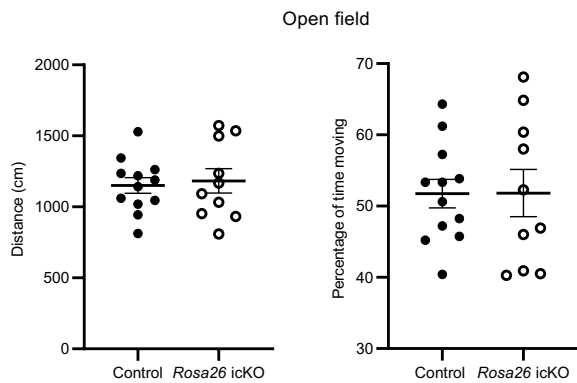

## B

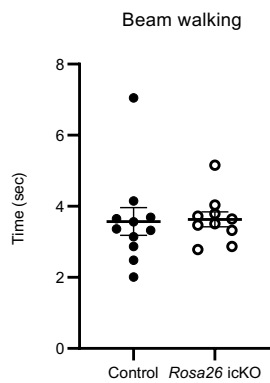

## C

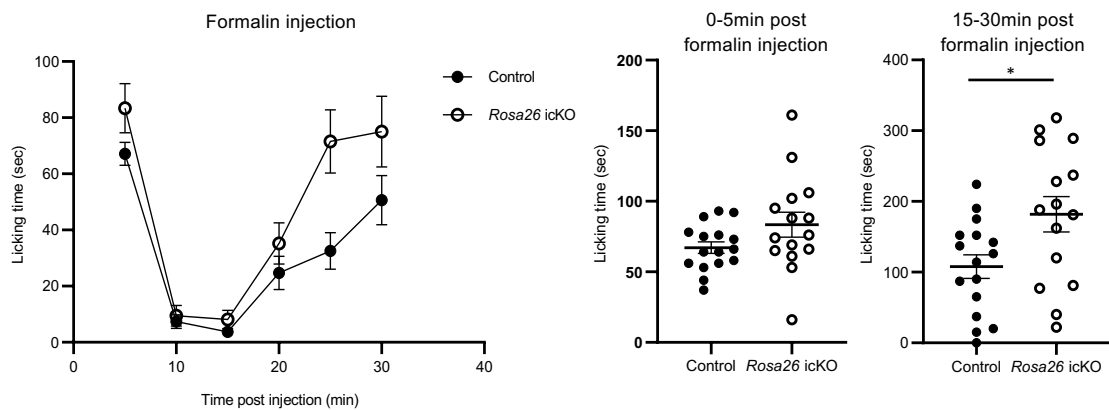



# Sup. Fig. 5

## *Avil* icKO vs Control DRG (non inj. side)

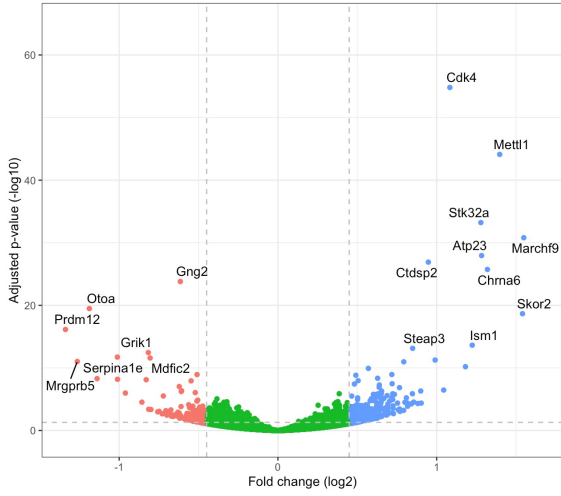

## *Avil* icKO vs Control DRG (formalin inj. side)

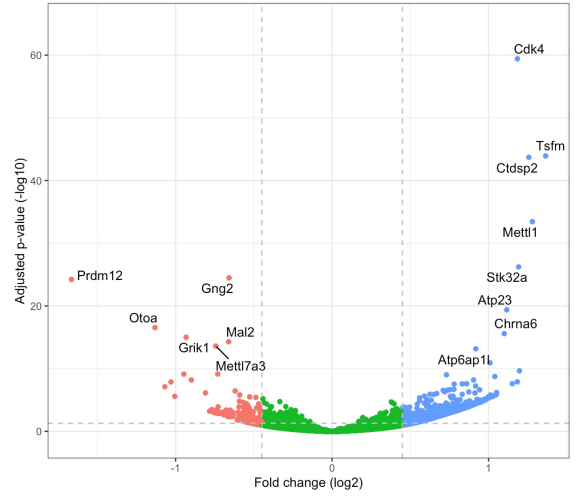

# Sup. Fig. 6

## A Formalin injected vs non injected DRG (control mice)

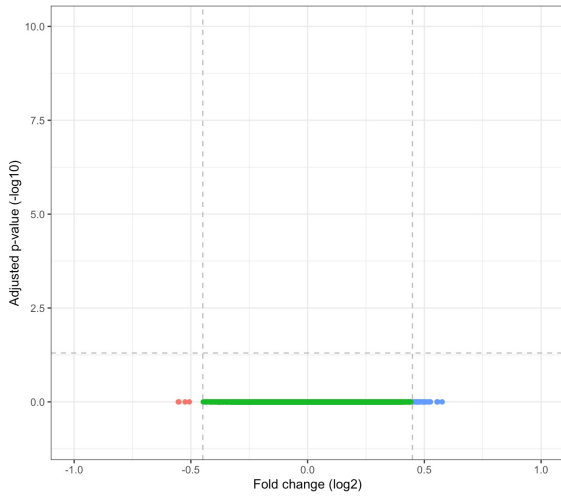

## Formalin injected vs non injected (*Avil* icKO)

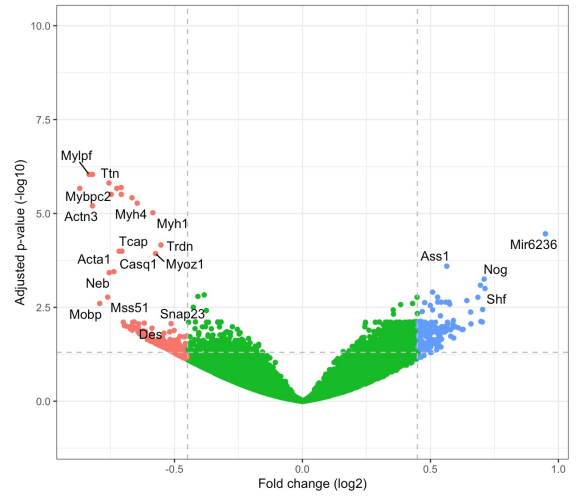

## B

### GO - Cellular Component DEG in Formalin injected icKO

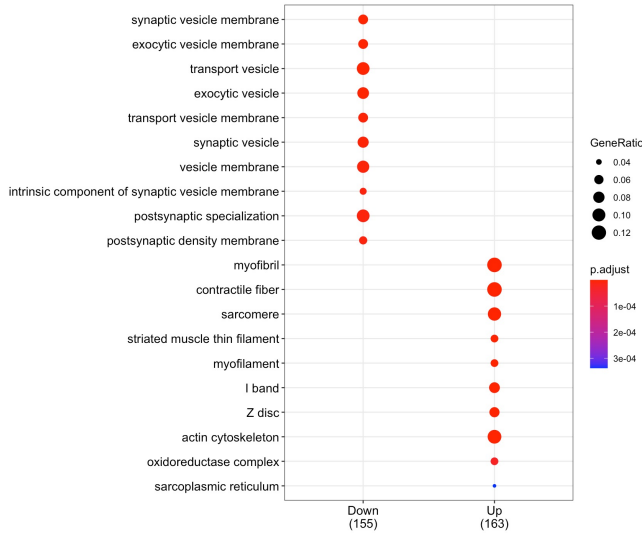

## C

### GO - Biological Process DEG in Formalin injected icKO

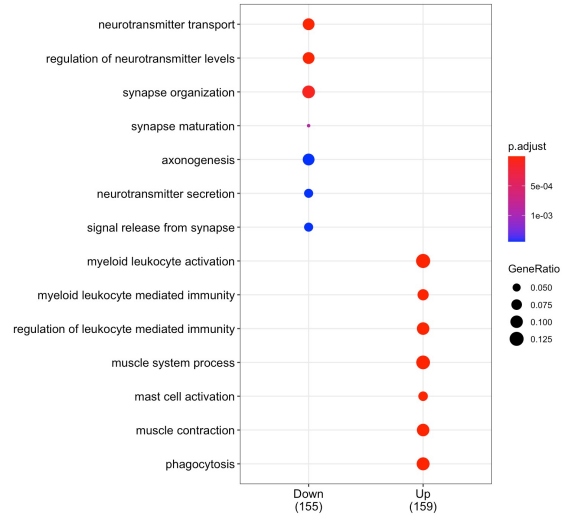

**Sup data Table 1: List of DEGs identified in DRG of *Avil* icKO mice. Genes in common with the list of DEGs from *Rosa26* icKO are indicated in bold.**

| gene_id            | gene_name            | padj        | log2 fold-change |
|--------------------|----------------------|-------------|------------------|
| ENSMUSG00000079466 | <b>Prdm12</b>        | 6,87618E-51 | -2,061218667     |
| ENSMUSG00000050967 | <b>Creg2</b>         | 2,22916E-12 | -1,150260952     |
| ENSMUSG00000005640 | <b>Insrr</b>         | 1,08601E-09 | -0,989022289     |
| ENSMUSG00000070551 | <b>Mrgprb5</b>       | 7,94579E-07 | -0,96718776      |
| ENSMUSG00000078612 | <b>Fyb2</b>          | 6,60899E-06 | -0,936113267     |
| ENSMUSG00000026971 | <b>Itgb6</b>         | 1,73878E-06 | -0,930051102     |
| ENSMUSG00000090667 | <b>Mdfic2</b>        | 2,99124E-13 | -0,833479826     |
| ENSMUSG00000085224 | <b>Gm13425</b>       | 8,15502E-10 | -0,832903464     |
| ENSMUSG00000035431 | <b>Sstr1</b>         | 0,000508315 | -0,821633603     |
| ENSMUSG00000043110 | <b>Lrrn4</b>         | 7,39693E-05 | -0,804405836     |
| ENSMUSG00000027221 | <b>Chst1</b>         | 2,24134E-07 | -0,800993472     |
| ENSMUSG00000022935 | <b>Grik1</b>         | 3,37132E-15 | -0,756899316     |
| ENSMUSG00000108393 | <b>Gm32633</b>       | 0,002333173 | -0,756433503     |
| ENSMUSG00000096146 | <b>Kcnj11</b>        | 0,000480546 | -0,748196108     |
| ENSMUSG00000074575 | <b>Kcng1</b>         | 0,00347177  | -0,722226091     |
| ENSMUSG00000108313 | <b>Gm45052</b>       | 0,007482341 | -0,696411441     |
| ENSMUSG00000028072 | <b>Ntrk1</b>         | 1,04309E-06 | -0,690969218     |
| ENSMUSG00000075070 | <b>4932412D23Rik</b> | 0,009591405 | -0,686890843     |
| ENSMUSG00000058057 | <b>Mettl7a3</b>      | 6,87983E-07 | -0,686216648     |
| ENSMUSG00000034990 | <b>Otoa</b>          | 4,46165E-06 | -0,681508842     |
| ENSMUSG00000029055 | Plch2                | 0,00082822  | -0,680242207     |
| ENSMUSG00000028794 | <b>A3galt2</b>       | 2,68531E-10 | -0,676373756     |
| ENSMUSG00000091722 | <b>Siah3</b>         | 3,64752E-08 | -0,665597345     |
| ENSMUSG00000046182 | <b>Gsg1l</b>         | 0,000205162 | -0,631496167     |
| ENSMUSG00000110020 | Gm45441              | 0,024241507 | -0,629366994     |
| ENSMUSG00000022304 | <b>Dpys</b>          | 0,015228369 | -0,615310752     |
| ENSMUSG00000106554 | Gm33474              | 0,035269324 | -0,611571694     |
| ENSMUSG00000030525 | <b>Chrna7</b>        | 0,003023635 | -0,597979724     |
| ENSMUSG00000066279 | Chrna10              | 0,044506234 | -0,59577922      |
| ENSMUSG00000052117 | D630039A03Rik        | 0,021129383 | -0,59513901      |
| ENSMUSG00000041773 | Enc1                 | 2,21627E-05 | -0,591706776     |
| ENSMUSG00000053886 | <b>Sh2d4a</b>        | 0,018753164 | -0,590103491     |
| ENSMUSG00000030200 | <b>Bcl2l14</b>       | 0,002342692 | -0,589299996     |
| ENSMUSG00000020591 | Ntsr2                | 0,003434903 | -0,586608519     |
| ENSMUSG00000020155 | <b>Kcnmb1</b>        | 3,69904E-05 | -0,577873142     |
| ENSMUSG00000026765 | <b>Lypd6b</b>        | 8,73594E-05 | -0,5772459       |
| ENSMUSG00000018500 | <b>Adora2b</b>       | 0,002186639 | -0,570072999     |
| ENSMUSG00000024479 | <b>Mal2</b>          | 2,56132E-09 | -0,568950874     |
| ENSMUSG00000021118 | <b>Plek2</b>         | 0,0002641   | -0,566186537     |
| ENSMUSG00000024366 | Gfra3                | 0,001463727 | -0,562052133     |
| ENSMUSG00000040867 | Begain               | 8,36821E-06 | -0,559889059     |

|                    |                |             |              |
|--------------------|----------------|-------------|--------------|
| ENSMUSG00000087014 | <b>Gm16364</b> | 0,001419061 | -0,556369075 |
| ENSMUSG00000034758 | Tle6           | 0,016785238 | -0,551092835 |
| ENSMUSG00000042254 | Cilp           | 0,009977591 | -0,547401572 |
| ENSMUSG00000090122 | Kcne1l         | 0,045355967 | -0,54493929  |
| ENSMUSG00000028148 | Them5          | 0,036402771 | -0,543657688 |
| ENSMUSG00000045288 | Ush1g          | 0,004267852 | -0,542189715 |
| ENSMUSG00000043004 | <b>Gng2</b>    | 5,92755E-11 | -0,541522522 |
| ENSMUSG00000063594 | <b>Gng8</b>    | 0,011744536 | -0,538529911 |
| ENSMUSG00000034773 | Hrob           | 0,022745801 | -0,529251415 |
| ENSMUSG00000021070 | Bdkrb2         | 0,02060274  | -0,528641913 |
| ENSMUSG00000002771 | Grin2d         | 0,003848654 | -0,528146897 |
| ENSMUSG00000036251 | <b>Trpm8</b>   | 0,019871541 | -0,523880437 |
| ENSMUSG00000066129 | Kndc1          | 0,012784124 | -0,522462843 |
| ENSMUSG00000059456 | Ptk2b          | 0,00263904  | -0,517684968 |
| ENSMUSG00000021294 | Kif26a         | 0,008717552 | -0,512027086 |
| ENSMUSG00000039508 | <b>Calhm4</b>  | 0,000263528 | -0,508184207 |
| ENSMUSG00000030283 | St8sia1        | 0,000508162 | -0,503319062 |
| ENSMUSG00000042826 | Fgf11          | 0,014456818 | -0,502679014 |
| ENSMUSG00000114547 | <b>Gm3226</b>  | 0,029431388 | -0,497499947 |
| ENSMUSG00000033256 | Shf            | 0,012188309 | -0,496385412 |
| ENSMUSG00000074006 | Omp            | 0,001264606 | -0,496116077 |
| ENSMUSG00000086915 | Gm16364        | 0,007482341 | -0,482256634 |
| ENSMUSG00000102752 | Gm7694         | 8,82685E-05 | -0,47309272  |
| ENSMUSG00000058975 | Kcnc1          | 0,038243455 | -0,472890643 |
| ENSMUSG00000026437 | Cdk18          | 0,033861268 | -0,472601471 |
| ENSMUSG00000032269 | Htr3a          | 0,024241507 | -0,472445939 |
| ENSMUSG00000040136 | Abcc8          | 0,00581554  | -0,471952056 |
| ENSMUSG00000040972 | Igsf21         | 0,046913099 | -0,464476024 |
| ENSMUSG00000000305 | Cdh4           | 0,0015443   | -0,464469962 |
| ENSMUSG00000038756 | <b>Ttll6</b>   | 0,016033496 | -0,4639528   |
| ENSMUSG00000041261 | Car8           | 0,04656829  | -0,461956361 |
| ENSMUSG00000025650 | Col7a1         | 0,006072258 | -0,457971301 |
| ENSMUSG00000099560 | Mrgprx3-ps     | 3,45001E-05 | 0,450529233  |
| ENSMUSG00000041986 | Elmod1         | 7,28079E-05 | 0,450989342  |
| ENSMUSG00000033278 | Ptprm          | 0,015333745 | 0,452191946  |
| ENSMUSG00000050783 | Htr1f          | 0,015480806 | 0,452397027  |
| ENSMUSG00000016918 | Sulf1          | 7,95623E-09 | 0,458878213  |
| ENSMUSG00000037795 | N4bp2          | 0,006954496 | 0,475695934  |
| ENSMUSG00000054196 | Cthrc1         | 0,003959486 | 0,47727586   |
| ENSMUSG00000025255 | Zfhx4          | 0,000240471 | 0,477863882  |
| ENSMUSG00000036111 | <b>Lmo1</b>    | 7,43091E-05 | 0,47947598   |
| ENSMUSG00000038128 | Camk4          | 0,002083642 | 0,480107348  |
| ENSMUSG00000029552 | <b>Tes</b>     | 0,000302034 | 0,483033991  |
| ENSMUSG00000024222 | <b>Fkbp5</b>   | 0,02431054  | 0,48430953   |

|                    |                      |             |             |
|--------------------|----------------------|-------------|-------------|
| ENSMUSG00000030666 | <b>Calcb</b>         | 2,06855E-06 | 0,484570461 |
| ENSMUSG00000059173 | Pde1a                | 0,000319544 | 0,484817396 |
| ENSMUSG00000042363 | Lgalsl               | 1,08495E-14 | 0,484852462 |
| ENSMUSG00000100706 | Gm19744              | 0,009591405 | 0,485311449 |
| ENSMUSG00000028003 | Lrat                 | 0,045373867 | 0,486806446 |
| ENSMUSG00000010755 | <b>Cars</b>          | 7,0847E-14  | 0,489920244 |
| ENSMUSG00000050377 | Il31ra               | 0,022897241 | 0,490252459 |
| ENSMUSG00000055865 | Tafa3                | 7,02126E-08 | 0,490961261 |
| ENSMUSG00000056498 | Tmem154              | 0,002415581 | 0,506000348 |
| ENSMUSG00000014782 | Plekhg4              | 0,018299137 | 0,508435674 |
| ENSMUSG00000068114 | Ccdc134              | 6,57947E-05 | 0,510027266 |
| ENSMUSG00000075270 | Pde11a               | 0,000145106 | 0,513422019 |
| ENSMUSG00000021032 | <b>Ngb</b>           | 0,000208804 | 0,519157361 |
| ENSMUSG00000052629 | <b>Gm9885</b>        | 0,000714518 | 0,520460621 |
| ENSMUSG00000042581 | <b>Thsd7b</b>        | 1,9713E-06  | 0,524987132 |
| ENSMUSG00000024601 | Isoc1                | 2,67519E-17 | 0,543356594 |
| ENSMUSG00000093502 | Gm20700              | 5,15189E-05 | 0,544465552 |
| ENSMUSG00000115317 | Gm32618              | 0,021690053 | 0,54678771  |
| ENSMUSG00000044164 | <b>Rnf182</b>        | 1,93078E-05 | 0,557427204 |
| ENSMUSG00000002459 | Rgs20                | 0,012875977 | 0,563565968 |
| ENSMUSG00000036960 | <b>Clca2</b>         | 0,013107622 | 0,566958947 |
| ENSMUSG00000029830 | Svopl                | 0,037934413 | 0,601883238 |
| ENSMUSG00000087651 | 1500009L16Rik        | 2,79894E-05 | 0,623953648 |
| ENSMUSG00000050534 | <b>Htr5b</b>         | 2,2881E-07  | 0,631242981 |
| ENSMUSG00000051980 | <b>Casr</b>          | 0,004781286 | 0,640877095 |
| ENSMUSG00000090191 | 9230105E05Rik        | 0,020340283 | 0,643447462 |
| ENSMUSG00000040569 | Slc26a7              | 6,87983E-07 | 0,645695009 |
| ENSMUSG00000041309 | <b>Nkx6-2</b>        | 0,013248743 | 0,646210223 |
| ENSMUSG00000037447 | <b>Arid5a</b>        | 1,50777E-12 | 0,649817027 |
| ENSMUSG00000020123 | Avpr1a               | 0,013471685 | 0,66726083  |
| ENSMUSG00000055409 | <b>Nell1</b>         | 0,007576232 | 0,671008586 |
| ENSMUSG00000039037 | St6galnac5           | 1,70214E-09 | 0,690193549 |
| ENSMUSG00000068117 | <b>Mei1</b>          | 0,002460754 | 0,724107358 |
| ENSMUSG00000044921 | Rassf9               | 1,24266E-07 | 0,724406481 |
| ENSMUSG00000071679 | Rtl4                 | 9,25856E-07 | 0,739929703 |
| ENSMUSG00000104610 | <b>Gm567</b>         | 3,66178E-05 | 0,750783534 |
| ENSMUSG00000115062 | <b>4930544F09Rik</b> | 0,002035389 | 0,751266273 |
| ENSMUSG00000060204 | Slc10a4-ps           | 0,002079989 | 0,760075706 |
| ENSMUSG00000026389 | <b>Steap3</b>        | 1,08601E-09 | 0,76765024  |
| ENSMUSG00000035910 | <b>Dcdc2a</b>        | 0,000210139 | 0,783174513 |
| ENSMUSG00000078958 | <b>Atp6ap1l</b>      | 2,51821E-11 | 0,78390427  |
| ENSMUSG00000105923 | A830019L24Rik        | 0,000827151 | 0,798816167 |
| ENSMUSG00000049115 | <b>Agtr1a</b>        | 2,40963E-13 | 0,838040151 |
| ENSMUSG00000063415 | <b>Cyp26b1</b>       | 0,000162086 | 0,860839619 |

|                    |                 |             |             |
|--------------------|-----------------|-------------|-------------|
| ENSMUSG00000091175 | <b>S100a7l2</b> | 1,69583E-05 | 0,902063267 |
| ENSMUSG00000074766 | <b>Ism1</b>     | 6,65662E-17 | 0,93836211  |
| ENSMUSG00000028294 | <b>Cfap206</b>  | 3,10223E-18 | 0,940283805 |
| ENSMUSG00000033470 | <b>Cysltr2</b>  | 2,29573E-15 | 0,977588253 |
| ENSMUSG00000091519 | <b>Skor2</b>    | 4,28507E-14 | 0,979688835 |
| ENSMUSG00000053441 | Adamts19        | 3,64752E-08 | 1,059809248 |
| ENSMUSG00000020811 | Wscd1           | 7,67586E-10 | 1,064527016 |
| ENSMUSG00000039954 | <b>Stk32a</b>   | 1,80843E-26 | 1,163398686 |
| ENSMUSG00000031491 | <b>Chrna6</b>   | 5,73609E-32 | 1,260920817 |
| ENSMUSG00000021478 | <b>Drd1</b>     | 5,92755E-11 | 1,295484019 |
| ENSMUSG00000056043 | <b>Rgs9bp</b>   | 4,14617E-23 | 1,594836464 |

**Sup data Table 2: List of DEGs identified in DRG of *Rosa26* icKO.** Genes in common with the list of DEGs from *Avil* icKO are indicated in bold.

| gene_id            | gene_name            | padj     | log2 fold change |
|--------------------|----------------------|----------|------------------|
| ENSMUSG00000079466 | <b>Prdm12</b>        | 4,88E-59 | -2,008959219     |
| ENSMUSG00000050967 | <b>Creg2</b>         | 2,6E-16  | -1,215122611     |
| ENSMUSG00000070551 | <b>Mrgprb5</b>       | 1,61E-08 | -0,996439748     |
| ENSMUSG00000043110 | <b>Lrrn4</b>         | 1,15E-07 | -0,951971537     |
| ENSMUSG00000037537 | H2-M11               | 2,1E-05  | -0,935850265     |
| ENSMUSG00000075070 | <b>4932412D23Rik</b> | 3,49E-05 | -0,914476967     |
| ENSMUSG00000000794 | Kcnn3                | 1,31E-08 | -0,879355199     |
| ENSMUSG00000005640 | <b>Insrr</b>         | 3,6E-08  | -0,874142688     |
| ENSMUSG00000022935 | <b>Grik1</b>         | 8E-25    | -0,83753511      |
| ENSMUSG00000072849 | Serpina1e            | 0,000165 | -0,817354794     |
| ENSMUSG00000102128 | Gm18349              | 1,06E-05 | -0,780758638     |
| ENSMUSG00000036251 | <b>Trpm8</b>         | 8,3E-07  | -0,772932567     |
| ENSMUSG00000032807 | Alox12b              | 0,001402 | -0,765883953     |
| ENSMUSG00000053886 | <b>Sh2d4a</b>        | 8,57E-05 | -0,756218005     |
| ENSMUSG00000061184 | Tmprss11c            | 1,94E-05 | -0,755629456     |
| ENSMUSG00000028813 | CK137956             | 0,000662 | -0,726446098     |
| ENSMUSG00000108313 | <b>Gm45052</b>       | 0,004808 | -0,704208344     |
| ENSMUSG00000078612 | <b>Fyb2</b>          | 0,00159  | -0,697434984     |
| ENSMUSG00000034990 | <b>Otoa</b>          | 1,7E-07  | -0,694039649     |
| ENSMUSG00000026971 | <b>Itgb6</b>         | 0,001165 | -0,691533894     |
| ENSMUSG00000058057 | <b>Mettl7a3</b>      | 1,57E-08 | -0,689355742     |
| ENSMUSG00000028794 | <b>A3galt2</b>       | 1,39E-13 | -0,683570833     |
| ENSMUSG00000022304 | <b>Dpys</b>          | 0,002756 | -0,678238065     |
| ENSMUSG00000090667 | <b>Mdfic2</b>        | 3,77E-10 | -0,647566669     |
| ENSMUSG00000020155 | <b>Kcnmb1</b>        | 2,86E-08 | -0,641054282     |
| ENSMUSG00000085224 | <b>Gm13425</b>       | 6,28E-07 | -0,628585056     |
| ENSMUSG00000023073 | Slc10a2              | 0,020058 | -0,62418181      |
| ENSMUSG00000027606 | Dnajc5b              | 0,020562 | -0,621024962     |
| ENSMUSG00000085111 | Ascl4                | 0,013669 | -0,614184046     |
| ENSMUSG00000091722 | <b>Siah3</b>         | 2,08E-08 | -0,610713799     |
| ENSMUSG00000029188 | Slc34a2              | 0,018055 | -0,609222481     |
| ENSMUSG00000108393 | <b>Gm32633</b>       | 0,021986 | -0,608131352     |
| ENSMUSG00000018500 | <b>Adora2b</b>       | 0,000165 | -0,601274454     |
| ENSMUSG00000035431 | <b>Sstr1</b>         | 0,028175 | -0,599752507     |
| ENSMUSG00000074575 | <b>Kcng1</b>         | 0,02109  | -0,598478594     |
| ENSMUSG00000024479 | <b>Mal2</b>          | 1,66E-13 | -0,594272485     |
| ENSMUSG00000079465 | <b>Col4a3</b>        | 0,003201 | -0,593618014     |
| ENSMUSG00000021118 | <b>Plek2</b>         | 5,92E-05 | -0,589940593     |
| ENSMUSG00000043004 | <b>Gng2</b>          | 5,47E-17 | -0,583374525     |
| ENSMUSG00000029281 | Smr2                 | 0,029065 | -0,579858109     |
| ENSMUSG00000037492 | Zmat4                | 2,96E-08 | -0,576796516     |

|                    |                |          |              |
|--------------------|----------------|----------|--------------|
| ENSMUSG00000030200 | <b>Bcl2l14</b> | 0,001015 | -0,566809391 |
| ENSMUSG00000096146 | <b>Kcnj11</b>  | 0,014157 | -0,557966576 |
| ENSMUSG00000025105 | Bnc1           | 0,048571 | -0,549297786 |
| ENSMUSG00000071317 | Bves           | 3,97E-07 | -0,537519937 |
| ENSMUSG00000005968 | Tuft1          | 0,000521 | -0,529270844 |
| ENSMUSG00000036760 | Kcnk9          | 0,014157 | -0,526823414 |
| ENSMUSG00000038756 | <b>Ttll6</b>   | 0,000797 | -0,521324    |
| ENSMUSG00000026765 | <b>Lypd6b</b>  | 0,000101 | -0,520492389 |
| ENSMUSG00000036036 | Zfp57          | 0,003825 | -0,518684156 |
| ENSMUSG00000039508 | <b>Calhm4</b>  | 0,000164 | -0,509945315 |
| ENSMUSG00000027221 | <b>Chst1</b>   | 0,004672 | -0,508610852 |
| ENSMUSG00000032420 | Nt5e           | 2,16E-09 | -0,506455901 |
| ENSMUSG00000029503 | P2rx2          | 0,011023 | -0,505974645 |
| ENSMUSG00000026828 | Galnt5         | 2,44E-07 | -0,505421762 |
| ENSMUSG00000030323 | lft122         | 0,00275  | -0,503537491 |
| ENSMUSG00000029994 | Anxa4          | 0,026372 | -0,502716897 |
| ENSMUSG00000101581 | C430002N11Rik  | 0,028428 | -0,491330605 |
| ENSMUSG00000043003 | Rasef          | 0,005429 | -0,489579356 |
| ENSMUSG00000051029 | Serpib1b       | 1,55E-05 | -0,484177871 |
| ENSMUSG00000063594 | <b>Gng8</b>    | 0,014834 | -0,476676938 |
| ENSMUSG00000030525 | <b>Chrna7</b>  | 0,013153 | -0,475809154 |
| ENSMUSG00000054988 | Agtr1b         | 0,005812 | -0,469644848 |
| ENSMUSG00000055067 | Smyd3          | 8,07E-11 | -0,46250136  |
| ENSMUSG00000030092 | Cntn6          | 0,028546 | -0,458086838 |
| ENSMUSG00000040016 | Ptger3         | 0,000155 | -0,457281598 |
| ENSMUSG00000015882 | Lcorl          | 2,76E-06 | -0,456475107 |
| ENSMUSG00000046182 | <b>Gsg1l</b>   | 0,015805 | -0,452413261 |
| ENSMUSG00000028072 | <b>Ntrk1</b>   | 0,001713 | -0,449454847 |
| ENSMUSG00000087014 | <b>Gm16364</b> | 0,0062   | -0,449232819 |
| ENSMUSG00000020635 | Fkbp1b         | 1,48E-26 | 0,452102521  |
| ENSMUSG00000022856 | Tmem41a        | 7,27E-08 | 0,454621586  |
| ENSMUSG0000002228  | Ppm1j          | 1,91E-11 | 0,455250313  |
| ENSMUSG00000029552 | <b>Tes</b>     | 0,000115 | 0,458279757  |
| ENSMUSG00000047604 | Frat2          | 0,000774 | 0,458325711  |
| ENSMUSG00000044927 | H1f10          | 0,015319 | 0,460477245  |
| ENSMUSG00000042275 | Pelo           | 0,03352  | 0,461399309  |
| ENSMUSG00000009614 | Sardh          | 0,010134 | 0,464635028  |
| ENSMUSG00000113390 | Gm32635        | 0,000187 | 0,472068017  |
| ENSMUSG00000033177 | Tmprss7        | 0,006947 | 0,47917211   |
| ENSMUSG00000087382 | Ctcflos        | 0,030131 | 0,480374905  |
| ENSMUSG00000044164 | <b>Rnf182</b>  | 0,000233 | 0,481806072  |
| ENSMUSG00000031210 | Gpr165         | 0,002506 | 0,482126096  |
| ENSMUSG00000046806 | Cyren          | 0,005268 | 0,484198749  |
| ENSMUSG00000020099 | Unc5b          | 0,003825 | 0,4856604    |



|                    |                      |          |             |
|--------------------|----------------------|----------|-------------|
| ENSMUSG00000037759 | Ptger2               | 0,006342 | 0,491715773 |
| ENSMUSG00000038354 | Ankrd35              | 4,73E-05 | 0,493341078 |
| ENSMUSG00000042581 | <b>Thsd7b</b>        | 9,69E-08 | 0,510327926 |
| ENSMUSG00000023945 | Slc5a7               | 0,025995 | 0,514961517 |
| ENSMUSG00000027230 | Creb3l1              | 0,006703 | 0,516163779 |
| ENSMUSG00000031492 | Chrn3                | 0,015667 | 0,517642458 |
| ENSMUSG00000059146 | Ntrk3                | 3,35E-05 | 0,518158011 |
| ENSMUSG00000022096 | Hr                   | 1,58E-07 | 0,520945468 |
| ENSMUSG00000033470 | <b>Cysltr2</b>       | 2,29E-05 | 0,526297229 |
| ENSMUSG00000004366 | Sst                  | 0,029391 | 0,527078629 |
| ENSMUSG00000112739 | Gm20597              | 0,014813 | 0,536932706 |
| ENSMUSG00000089762 | Ier5l                | 0,003596 | 0,537949199 |
| ENSMUSG00000021765 | Fst                  | 0,030131 | 0,538141161 |
| ENSMUSG00000030376 | Slc8a2               | 0,007338 | 0,544046923 |
| ENSMUSG00000010755 | <b>Cars</b>          | 2,92E-20 | 0,550610904 |
| ENSMUSG00000021032 | <b>Ngb</b>           | 8,9E-06  | 0,557502735 |
| ENSMUSG00000030666 | <b>Calcb</b>         | 8,75E-12 | 0,567460179 |
| ENSMUSG00000024222 | <b>Fkbp5</b>         | 0,000318 | 0,576882551 |
| ENSMUSG00000041930 | Fam222a              | 0,003241 | 0,577587007 |
| ENSMUSG00000091175 | <b>S100a7l2</b>      | 0,016582 | 0,584988642 |
| ENSMUSG00000028294 | <b>Cfap206</b>       | 7,5E-09  | 0,606630051 |
| ENSMUSG00000066687 | Zbtb16               | 0,024926 | 0,607342018 |
| ENSMUSG00000055409 | <b>Nell1</b>         | 0,009713 | 0,612649928 |
| ENSMUSG00000051980 | <b>Casr</b>          | 0,002696 | 0,619073815 |
| ENSMUSG00000036960 | <b>Clca2</b>         | 0,002841 | 0,620140377 |
| ENSMUSG00000068117 | <b>Mei1</b>          | 0,00866  | 0,631708241 |
| ENSMUSG00000104610 | <b>Gm567</b>         | 0,000526 | 0,633077879 |
| ENSMUSG00000115062 | <b>4930544F09Rik</b> | 0,012705 | 0,638681636 |
| ENSMUSG00000035910 | <b>Dcdc2a</b>        | 0,002042 | 0,654676394 |
| ENSMUSG00000043557 | Mdga1                | 2,18E-05 | 0,657832889 |
| ENSMUSG00000050534 | <b>Htr5b</b>         | 5,66E-09 | 0,662761743 |
| ENSMUSG00000006344 | Ggt5                 | 4,28E-06 | 0,668947736 |
| ENSMUSG00000074766 | <b>Ism1</b>          | 1,55E-09 | 0,669250196 |
| ENSMUSG00000047259 | Mc4r                 | 0,005128 | 0,691369893 |
| ENSMUSG00000037447 | <b>Arid5a</b>        | 7,22E-17 | 0,697435544 |
| ENSMUSG00000063415 | <b>Cyp26b1</b>       | 0,002176 | 0,720855201 |
| ENSMUSG00000036111 | <b>Lmo1</b>          | 2,04E-14 | 0,752847573 |
| ENSMUSG00000021647 | <b>Cartpt</b>        | 1,47E-05 | 0,786644836 |
| ENSMUSG00000015134 | Aldh1a3              | 1,44E-05 | 0,792046215 |
| ENSMUSG00000049115 | <b>Agtr1a</b>        | 6,61E-15 | 0,792971772 |
| ENSMUSG00000052629 | <b>Gm9885</b>        | 1,91E-10 | 0,815965861 |
| ENSMUSG00000074934 | <b>Grem1</b>         | 0,000155 | 0,846626835 |
| ENSMUSG00000026389 | <b>Steap3</b>        | 1,7E-15  | 0,85720776  |
| ENSMUSG00000041309 | <b>Nkx6-2</b>        | 5,92E-05 | 0,874545108 |

|                    |                 |          |             |
|--------------------|-----------------|----------|-------------|
| ENSMUSG00000078958 | <b>Atp6ap1l</b> | 8,48E-20 | 0,987706691 |
| ENSMUSG00000031491 | <b>Chrna6</b>   | 6,31E-26 | 1,0070795   |
| ENSMUSG00000020811 | <b>Wscd1</b>    | 3,93E-10 | 1,044960286 |
| ENSMUSG00000091519 | <b>Skor2</b>    | 5,56E-21 | 1,092590668 |
| ENSMUSG00000039954 | <b>Stk32a</b>   | 1,51E-37 | 1,231914038 |
| ENSMUSG00000056043 | <b>Rgs9bp</b>   | 3,49E-15 | 1,240084519 |
| ENSMUSG00000021478 | <b>Drd1</b>     | 9,15E-11 | 1,270111152 |

**Sup data Table 3: List of DEG identified in TG of *Rosa26* icKO.** Genes in common with the list of DEGs from DRG of *Rosa26* icKO are indicated in bold. Genes in common with the list of DEGs from DRG of *Avil* icKO are in italic.

| gene_id            | gene_name             | padj     | log2 fold change |
|--------------------|-----------------------|----------|------------------|
| ENSMUSG00000079466 | <b><i>Prdm12</i></b>  | 5,28E-49 | -1,474695164     |
| ENSMUSG00000050967 | <b><i>Creg2</i></b>   | 6,7E-25  | -0,93852079      |
| ENSMUSG00000005640 | <i>Insrr</i>          | 1,07E-15 | -0,849368472     |
| ENSMUSG00000028072 | <b><i>Ntrk1</i></b>   | 6E-10    | -0,632605234     |
| ENSMUSG00000020155 | <b><i>Kcnmb1</i></b>  | 8,25E-10 | -0,626617269     |
| ENSMUSG00000085224 | <b><i>Gm13425</i></b> | 4,02E-12 | -0,579449626     |
| ENSMUSG00000029281 | <b><i>Smr2</i></b>    | 1,4E-06  | -0,578229851     |
| ENSMUSG00000022935 | <b><i>Grik1</i></b>   | 4,13E-12 | -0,54169118      |
| ENSMUSG00000059456 | <i>Ptk2b</i>          | 9,45E-08 | -0,513249628     |
| ENSMUSG00000022840 | <i>Adcy5</i>          | 6E-10    | -0,510500219     |
| ENSMUSG00000063796 | <i>Slc22a8</i>        | 7,16E-05 | -0,50682555      |
| ENSMUSG00000039323 | <i>Igfbp2</i>         | 0,000115 | -0,496065754     |
| ENSMUSG00000004655 | <i>Aqp1</i>           | 4,13E-12 | -0,491476955     |
| ENSMUSG00000029843 | <i>Slc13a4</i>        | 0,000172 | -0,484454347     |
| ENSMUSG00000086425 | <i>F730016J06Rik</i>  | 0,000307 | -0,473255713     |
| ENSMUSG00000048424 | <i>Ranbp3l</i>        | 0,000333 | -0,462607437     |
| ENSMUSG00000030525 | <b><i>Chrna7</i></b>  | 4,27E-09 | -0,455049524     |
| ENSMUSG00000015090 | <i>Ptgds</i>          | 0,000804 | -0,449116047     |
| ENSMUSG00000024650 | <i>Slc22a6</i>        | 0,000706 | -0,448653484     |
| ENSMUSG00000063594 | <b><i>Gng8</i></b>    | 0,000578 | -0,440793251     |
| ENSMUSG00000034773 | <i>Hrob</i>           | 0,001385 | -0,437359926     |
| ENSMUSG00000048387 | <i>Osr1</i>           | 0,001535 | -0,42563754      |
| ENSMUSG00000042671 | <i>Rgs8</i>           | 0,000172 | -0,42450219      |
| ENSMUSG00000027840 | <i>Wnt2b</i>          | 6,2E-05  | -0,423894512     |
| ENSMUSG00000019876 | <i>Pkib</i>           | 0,000148 | -0,419364094     |
| ENSMUSG00000025867 | <i>Cplx2</i>          | 9,45E-08 | -0,409165088     |
| ENSMUSG00000027737 | <i>Slc7a11</i>        | 0,002393 | -0,409069744     |
| ENSMUSG00000021070 | <i>Bdkrb2</i>         | 0,000324 | -0,40901335      |
| ENSMUSG00000029188 | <b><i>Slc34a2</i></b> | 0,002894 | -0,406876773     |
| ENSMUSG00000079507 | <i>H2-Q1</i>          | 0,002573 | -0,405518027     |
| ENSMUSG00000028794 | <b><i>A3galt2</i></b> | 1,93E-05 | -0,405449484     |
| ENSMUSG00000078612 | <b><i>Fyb2</i></b>    | 0,00249  | -0,404939972     |
| ENSMUSG00000036814 | <i>Slc6a20a</i>       | 0,003626 | -0,404845606     |
| ENSMUSG00000028785 | <i>Hpca</i>           | 0,002971 | -0,403398701     |
| ENSMUSG00000027654 | <i>Fam83d</i>         | 0,004502 | -0,403359779     |
| ENSMUSG00000045288 | <i>Ush1g</i>          | 0,004281 | -0,403284069     |
| ENSMUSG00000026259 | <i>Ngef</i>           | 0,004635 | -0,401446841     |
| ENSMUSG00000046352 | <i>Gjb2</i>           | 0,004241 | -0,399378328     |
| ENSMUSG00000020884 | <i>Asgr1</i>          | 0,004491 | -0,395902762     |
| ENSMUSG00000105576 | <i>Gm42164</i>        | 0,00271  | -0,390783215     |

|                    |                 |          |              |
|--------------------|-----------------|----------|--------------|
| ENSMUSG00000055235 | Wdr86           | 0,007609 | -0,388255775 |
| ENSMUSG00000032796 | Lama1           | 0,00249  | -0,386750336 |
| ENSMUSG00000018459 | Slc13a3         | 0,008054 | -0,386666692 |
| ENSMUSG00000058057 | <b>Mettl7a3</b> | 0,000524 | -0,386535283 |
| ENSMUSG00000027221 | <b>Chst1</b>    | 0,001963 | -0,38572861  |
| ENSMUSG00000032243 | Itga11          | 0,003531 | -0,384436287 |
| ENSMUSG00000021294 | <i>Kif26a</i>   | 0,006021 | -0,384023682 |
| ENSMUSG00000026062 | Slc9a2          | 0,008651 | -0,382596024 |
| ENSMUSG00000048373 | Fgfbp1          | 0,009005 | -0,377403976 |
| ENSMUSG00000013584 | Aldh1a2         | 0,011223 | -0,376428571 |
| ENSMUSG00000074743 | Thbd            | 0,011304 | -0,374736809 |
| ENSMUSG00000033174 | Mgll            | 0,003076 | -0,373699983 |
| ENSMUSG00000048939 | Atp13a5         | 0,010162 | -0,372870147 |
| ENSMUSG00000046402 | Rbp1            | 0,00724  | -0,371006991 |
| ENSMUSG00000039004 | Bmp6            | 0,013224 | -0,369453785 |
| ENSMUSG00000040659 | Efhd2           | 0,000652 | -0,369407015 |
| ENSMUSG00000035200 | Chrn4           | 0,008054 | -0,367435675 |
| ENSMUSG00000087014 | <b>Gm16364</b>  | 0,002528 | -0,36679738  |
| ENSMUSG00000058396 | Gpr182          | 0,01497  | -0,365286438 |
| ENSMUSG00000026475 | Rgs16           | 0,013483 | -0,364144851 |
| ENSMUSG00000041120 | Nbl1            | 0,00249  | -0,363495771 |
| ENSMUSG00000020473 | Aebp1           | 0,01568  | -0,362772496 |
| ENSMUSG00000043099 | Hic1            | 0,01497  | -0,361377919 |
| ENSMUSG00000032269 | <i>Htr3a</i>    | 0,000107 | -0,358776614 |
| ENSMUSG00000032128 | Robo3           | 0,013554 | -0,356580761 |
| ENSMUSG00000036760 | <b>Kcnk9</b>    | 0,021804 | -0,352661296 |
| ENSMUSG00000070304 | Scn2b           | 0,017388 | -0,347408606 |
| ENSMUSG00000034990 | <b>Otoa</b>     | 0,026486 | -0,346044648 |
| ENSMUSG00000041559 | Fmod            | 0,019901 | -0,345560304 |
| ENSMUSG00000068735 | Trp53i11        | 0,029986 | -0,341278025 |
| ENSMUSG00000042215 | Bag2            | 0,000534 | -0,337699922 |
| ENSMUSG00000024479 | <b>Mal2</b>     | 2,59E-06 | -0,337672296 |
| ENSMUSG00000032420 | <b>Nt5e</b>     | 0,000296 | -0,33318022  |
| ENSMUSG00000102128 | <b>Gm18349</b>  | 0,017818 | -0,333041054 |
| ENSMUSG00000017344 | Vtn             | 0,038325 | -0,332357712 |
| ENSMUSG00000024366 | <i>Gfra3</i>    | 0,003385 | -0,331853806 |
| ENSMUSG00000006014 | Prg4            | 0,034351 | -0,327774166 |
| ENSMUSG00000009378 | Slc16a12        | 0,010424 | -0,327413712 |
| ENSMUSG00000021822 | Plau            | 0,013354 | -0,326378974 |
| ENSMUSG00000042604 | Kcna4           | 0,000456 | -0,325950251 |
| ENSMUSG00000028125 | Abca4           | 0,040702 | -0,325724792 |
| ENSMUSG00000024036 | Slc37a1         | 0,002346 | -0,325707489 |
| ENSMUSG00000005968 | <b>Tuft1</b>    | 0,044266 | -0,323561884 |
| ENSMUSG00000054477 | Kcnn2           | 0,005725 | -0,322494484 |
